# Supplementary material
Source: publisher figshare collection journal article supplement (https://frontiersin.figshare.com/ndownloader/files/14284610)
Supplement: Supplementary file [file 14284610]

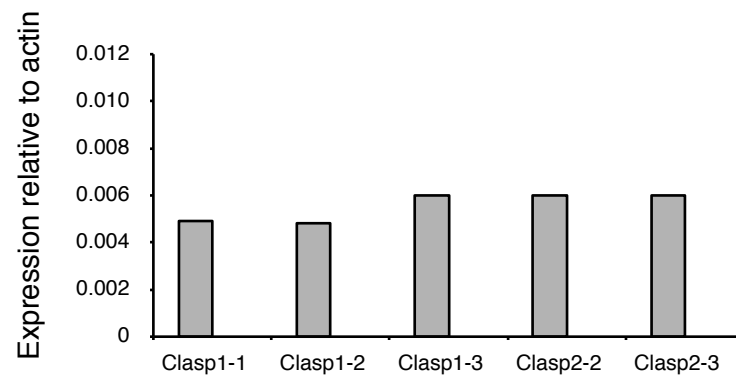

Figure S4. Expression of *Clasp1* and -2 in N1E-115 cells. RT-PCR analysis comparing *Clasp1* and *Clasp2* mRNA levels in N1E-115 cells. Three primer sets were used for *Clasp1*, two sets were used for *Clasp2*.
